# Supplementary material
Source: PubMed Central journal article supplement (PMC3556230)
Supplement: NIHMS426223-supplement-Supp_Material.pdf [file NIHMS426223-supplement-Supp_Material.pdf]

## **Supporting Information**

### **The structure and repertoire of small interfering RNAs in *Leishmania (Viannia) braziliensis* reveal diversification in the trypanosomatid RNAi pathway**

Vanessa D. Atayde<sup>1,6</sup>, Huafang Shi<sup>1</sup>, Joseph B. Franklin<sup>2</sup>, Nicholas Carriero<sup>3</sup>, Timothy Notton<sup>4, 7</sup>,  
Lon-Fye Lye<sup>4</sup>, Katherine Owens<sup>4</sup>, Stephen M. Beverley<sup>4</sup>, Christian Tschudi<sup>5</sup>,  
and Elisabetta Ullu<sup>1, 2, \*</sup>

<sup>1</sup>Departments of Internal Medicine and <sup>2</sup>Cell Biology, School of Medicine, Yale University, New Haven, CT, 06536, USA; <sup>3</sup>Department of Computer Science, Yale University, New Haven, CT, 06520, USA; <sup>4</sup>Department of Molecular Microbiology, School of Medicine, Washington University, St. Louis, MO, 63110, USA; <sup>5</sup>Department of Epidemiology of Microbial Diseases, School of Public Health, Yale University, New Haven, CT, 06536, USA.

\*For correspondence. E-mail: [elisabetta.ullu@yale.edu](mailto:elisabetta.ullu@yale.edu); Tel. (+1) 203 785 3563; Fax. (+1) 203 785 7329

**A**

## siRNA-producing loci

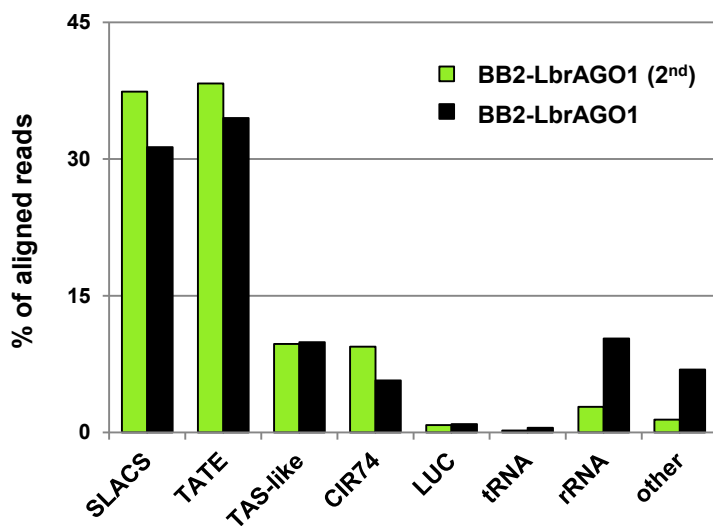**B**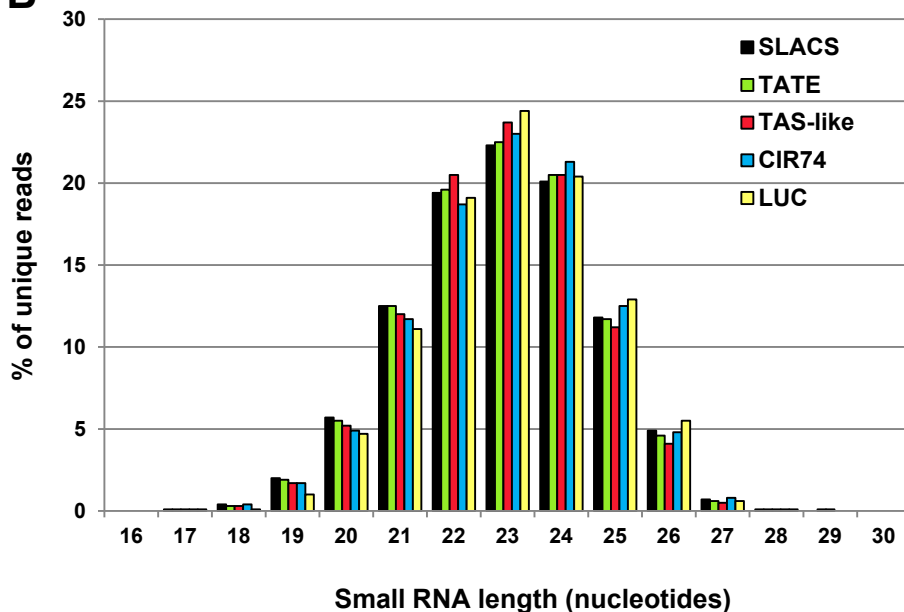**Fig. S1.** Further analysis of the *L. braziliensis* siRNA repertoire.

(A) RNA-Seq reads from two independent BB2-*LbrAGO1* libraries were aligned to the *L. braziliensis* genome version 2.0 allowing with up to 2 mismatches and distributed into classes as indicated in the diagram. “Other” includes snoRNAs, snRNAs, mRNAs and unidentified reads. (B) Size distribution of unique siRNAs (2<sup>nd</sup> BB2-*LbrAGO1* library) from SLACS, TATE, TAS-like, CIR74 and LUC classes.

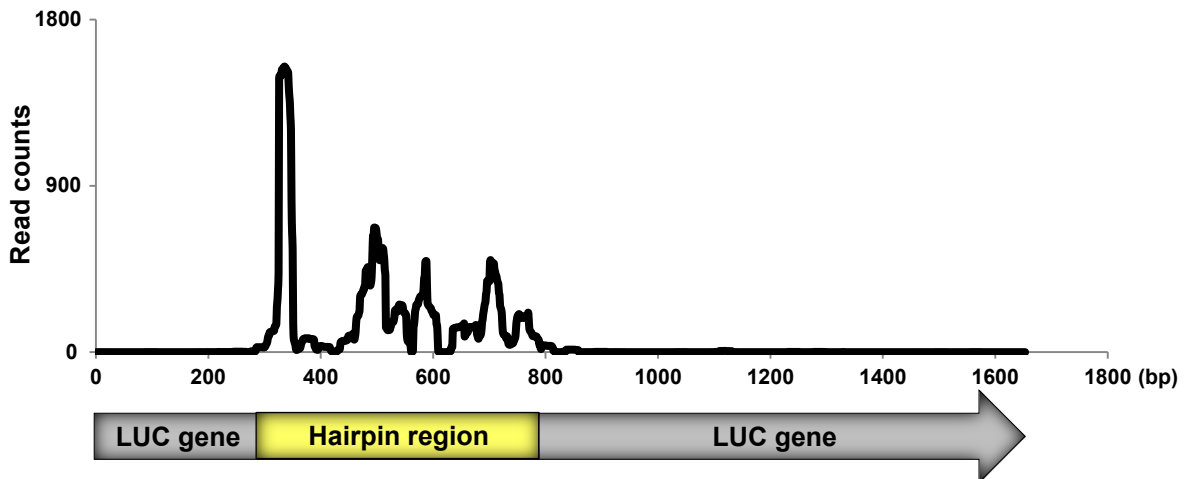

**Fig. S2.** Distribution of reads through the LUC gene.  
Distribution of unique LUC-derived reads through the LUC gene. The region used to generate the hairpin structure for RNAi is represented by the yellow box.

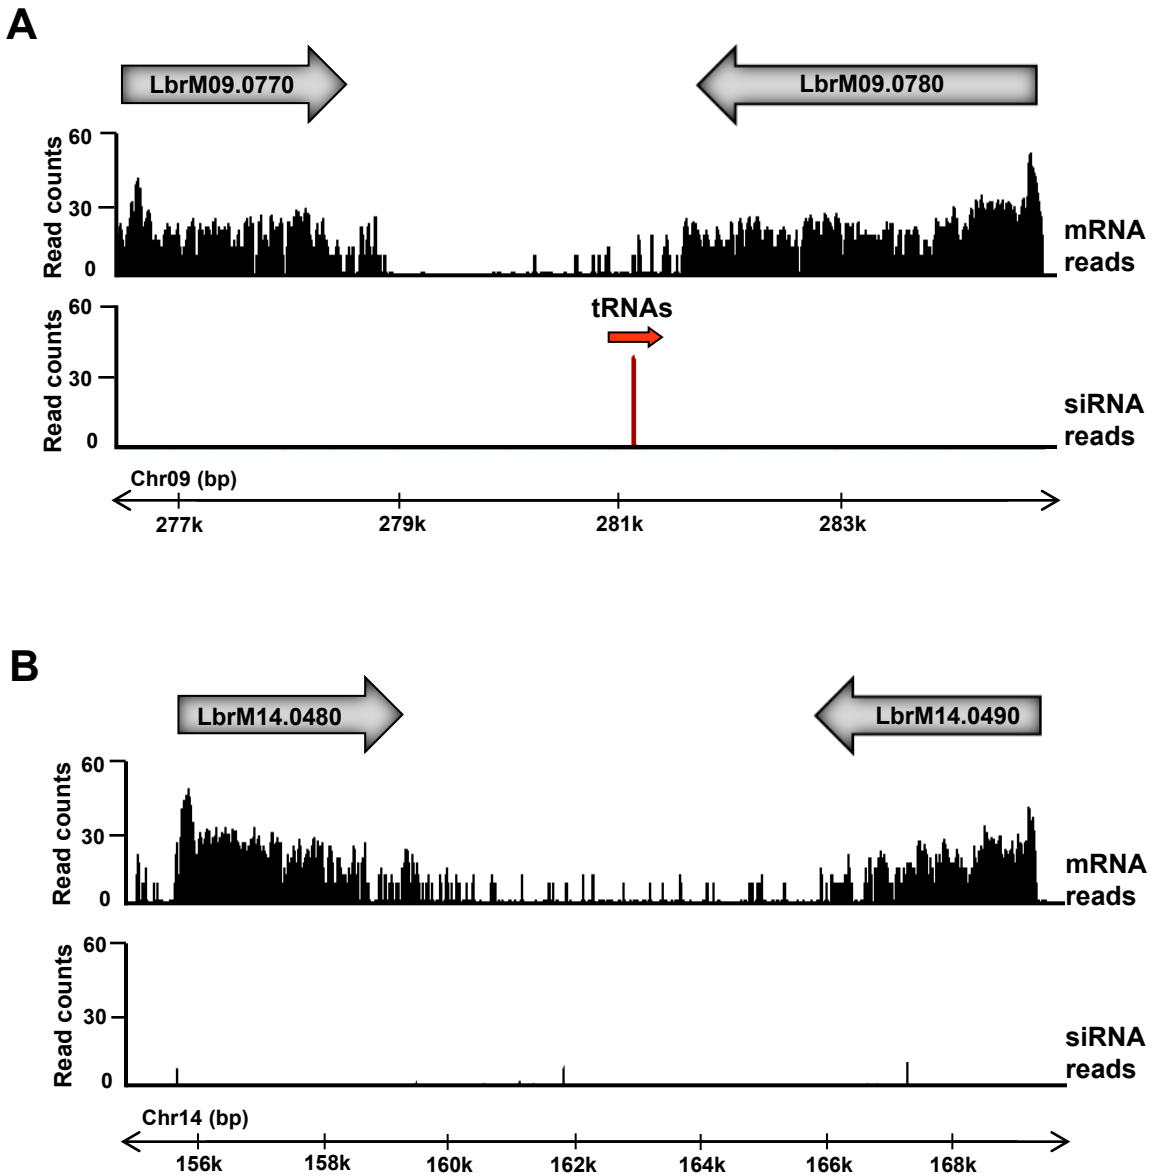

**Fig. S3.** *L. braziliensis* Convergent Transcription Units (CTUs) are not sources of siRNAs.

Snapshots of the *L. braziliensis* Genome Browser showing the distribution of mRNA reads (upper panel; unpublished data) and small RNA reads (lower panel) at two CTU loci ([www.TriTrypDB.org](http://www.TriTrypDB.org)). (A) CTU locus from chromosome 9, with a tRNA gene cluster in-between the convergent transcription units. (B) CTU locus from chromosome 14. Grey arrows represent predicted open reading frames. Red arrow represents tRNA genes.

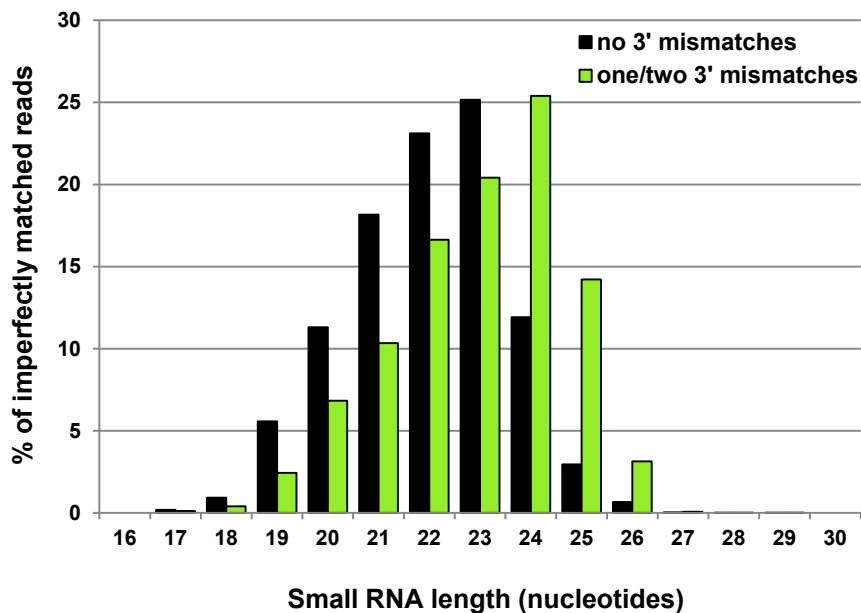

**Fig. S4.** Size distribution of perfectly matched reads versus reads that contain one or two 3' end mismatches.

Size distribution of redundant reads that aligned to the *L. braziliensis* genome after trimming the 3' adapter, subtracting putative degradation products, and grouping in perfectly-matched (no 3' mismatches) or one/two non-templated 3' nucleotides (one/two 3' mismatches).

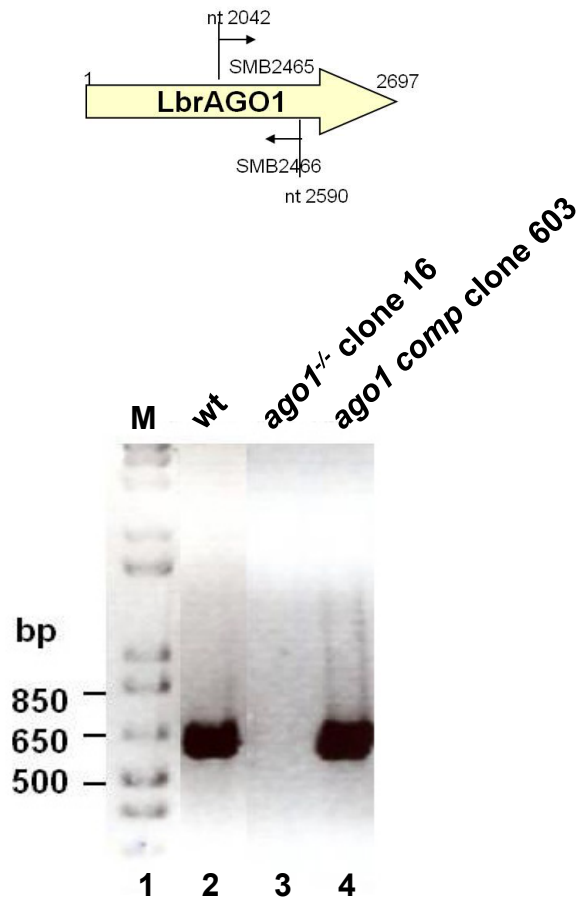

**Fig. S5.** Deletion and complementation of the *L. braziliensis* AGO1 gene. Schematic representation of the *L. braziliensis* Ago1 gene and position of oligonucleotides used in the PCR (top panel). Drawing is not to scale. PCR tests establishing the absence of AGO1 in the *ago1*<sup>-/-</sup> cell line clone 16 (lane 3, bottom panel) and its restoration in the complemented cell line (lane 4, bottom panel).

**Table S1.** Read distribution at convergent (CTU) and divergent transcription units (DTU).

| <b>Location</b>          | <b>Designation</b> | <b>Length</b>  | <b>siRNA reads</b> |
|--------------------------|--------------------|----------------|--------------------|
| LbrM.02:125000..144999   | CTU                | 20000          | 22                 |
| LbrM.03:197900..217899   | CTU                | 20000          | 56                 |
| LbrM.04:309900..328199   | CTU                | 18300          | 1                  |
| LbrM.05:390000..409999   | CTU                | 20000          | 4                  |
| LbrM.09:215000..234999   | CTU                | 20000          | 3                  |
| LbrM.09:270000..289999   | CTU                | 20000          | 319                |
| LbrM.10:251000..270999   | CTU                | 20000          | 4                  |
| LbrM.10:543900..561599   | CTU                | 17700          | 3                  |
| LbrM.11:73000..95999     | CTU                | 23000          | 21                 |
| LbrM.12:162000..182999   | CTU                | 21000          | 10                 |
| LbrM.13:182000..202999   | CTU                | 21000          | 42                 |
| LbrM.14:154000..174999   | CTU                | 21000          | 12                 |
| LbrM.15:314000..334999   | CTU                | 21000          | 143                |
| LbrM.16:431000..452999   | CTU                | 22000          | 137                |
| LbrM.17:423000..443999   | CTU                | 21000          | 56                 |
| LbrM.18:414000..435999   | CTU                | 22000          | 9                  |
| LbrM.20:414000..433999   | CTU                | 20000          | 536                |
| LbrM.21:421000..441999   | CTU                | 20149          | 12                 |
| LbrM.22:450000..469999   | CTU                | 19427          | 25                 |
| LbrM.23:711000..731999   | CTU                | 21000          | 24                 |
| LbrM.24:434000..455999   | CTU                | 22000          | 25                 |
| LbrM.24:589000..609999   | CTU                | 21000          | 159                |
| LbrM.25:354000..376999   | CTU                | 23000          | 17                 |
| LbrM.27:379000..399999   | CTU                | 21000          | 68                 |
| LbrM.27:719000..739999   | CTU                | 21000          | 105                |
| LbrM.28:107000..127999   | CTU                | 21000          | 100                |
| LbrM.28:604000..625999   | CTU                | 22000          | 2                  |
| LbrM.28:1052000..1071999 | CTU                | 20000          | 7                  |
| LbrM.29:620000..639999   | CTU                | 20000          | 1                  |
| LbrM.30:690000..710999   | CTU                | 21000          | 23                 |
| LbrM.31:180000..199999   | CTU                | 20000          | 19                 |
| LbrM.32:545000..565999   | CTU                | 21000          | 50                 |
| LbrM.34:543000..564999   | CTU                | 22000          | 94                 |
| LbrM.34:984000..1006999  | CTU                | 23000          | 2                  |
| LbrM.35:1029000..1049999 | CTU                | 19234          | 15                 |
| LbrM.35:1882000..1901999 | CTU                | 20000          | 104                |
| LbrM.35:498000..518999   | CTU                | 21000          | 372                |
| LbrM.35:1113000..1132999 | CTU                | 20000          | 1                  |
|                          |                    |                |                    |
|                          | <b>38 CTUs</b>     | <b>Average</b> | <b>69</b>          |
|                          |                    |                |                    |
|                          |                    |                |                    |

|                          |                |                |           |
|--------------------------|----------------|----------------|-----------|
| LbrM.06:112000..131699   | DTU            | 19700          | 19        |
| LbrM.09:230000..249999   | DTU            | 20000          | 6         |
| LbrM.13:90000..109999    | DTU            | 20000          | 13        |
| LbrM.14:385000..404999   | DTU            | 20000          | 11        |
| LbrM.15:82000..101999    | DTU            | 20000          | 24        |
| LbrM.16:333000..355999   | DTU            | 23000          | 7         |
| LbrM.16:614000..633999   | DTU            | 20000          | 7         |
| LbrM.17:391000..411999   | DTU            | 21000          | 1         |
| LbrM.18:224000..244999   | DTU            | 21000          | 34        |
| LbrM.20.1:19000..40999   | DTU            | 22000          | 12        |
| LbrM.20.1:874000..894999 | DTU            | 21000          | 40        |
| LbrM.22:291000..311999   | DTU            | 21000          | 2         |
| LbrM.22:549000..568999   | DTU            | 20000          | 1         |
| LbrM.23:486000..506999   | DTU            | 21000          | 1         |
| LbrM.24:544000..564999   | DTU            | 21000          | 2         |
| LbrM.25:194000..216999   | DTU            | 23000          | 21        |
| LbrM.25:627000..647999   | DTU            | 21000          | 19        |
| LbrM.26:280000..299999   | DTU            | 20000          | 3         |
| LbrM.27:69000..89999     | DTU            | 21000          | 1         |
| LbrM.27:999000..1019999  | DTU            | 21000          | 751       |
| LbrM.28:270000..290999   | DTU            | 21000          | 14        |
| LbrM.28:833000..853999   | DTU            | 21000          | 3         |
| LbrM.29:328000..348999   | DTU            | 21000          | 9         |
| LbrM.29:950000..969999   | DTU            | 20000          | 27        |
| LbrM.30:250000..269999   | DTU            | 20000          | 27        |
| LbrM.32:202000..222999   | DTU            | 21000          | 1         |
| LbrM.32:1182000..1201999 | DTU            | 20000          | 22        |
| LbrM.33:208000..227999   | DTU            | 20000          | 5         |
| LbrM.34:1458000..1477999 | DTU            | 20000          | 2         |
| LbrM.34:635000..656999   | DTU            | 22000          | 3         |
| LbrM.35:170000..189999   | DTU            | 20000          | 39        |
| LbrM.35:799000..818999   | DTU            | 20000          | 32        |
|                          |                |                |           |
|                          | <b>32 DTUs</b> | <b>Average</b> | <b>36</b> |



## Additional experimental procedure

### Library preparation from small interfering RNAs

- The protocol described below was modified from the original version kindly provided to us by Dr. Gregory Hannon (Cold Spring Harbor Laboratory, NY, USA).

- Making libraries from small RNAs is a multistep and relatively long procedure. Prior experience with handling RNA and working with small amounts of material is strongly advised.

- It is essential to use freshly-made solutions, clean the working area and pipettes and avoid working on a bench where you or others have used RNase or made “big” PCR amplifications.

#### 1. Ligation to 3' adaptor

3' adaptor (Modban-IDT)                      AMP-5'p=5'pCTGTAGGCACCATCAATdideoxyC-3'

**1A.** Purify small RNAs from Argonaute immunoprecipitates (100 ml of procyclic cells, 300 ml BS trypanosomes or 500 ml *Leishmania* promastigotes ( $2 \times 10^7$ /ml) are sufficient). RNA should be extracted from the beads with phenol:chloroform and not with TRIZOL, and resuspended in 10  $\mu$ l of water. An aliquot of the RNA is radiolabeled at the 3' end with [5'-<sup>32</sup>P]pCp to serve as a tracer during the various steps. Alternatively, the 5' end of the RNA can be labeled with T4 polynucleotide kinase and [ $\gamma$ -<sup>32</sup>P]ATP. We have used either method successfully.

**1B.** Label 1/10 of the RNA with radiolabeled [5'-<sup>32</sup>P]pCp. Set up the following reaction:

|                          |           |
|--------------------------|-----------|
| RNA                      | 1 $\mu$ l |
| DMSO                     | 1 $\mu$ l |
| [5'- <sup>32</sup> P]pCp | 5 $\mu$ l |

Heat at 90°C for 30 sec, keep on ice and spin briefly. Then add:

|               |           |
|---------------|-----------|
| 10x Buffer    | 1 $\mu$ l |
| 10 mM ATP     | 1 $\mu$ l |
| T4 RNA ligase | 1 $\mu$ l |

10x Buffer: 500 mM Tris-HCl pH 7.5, 100 mM MgCl<sub>2</sub>, 100 mM DTT, 500  $\mu$ g/ml BSA

Incubate overnight (ON) at 4°C. Add 35  $\mu$ l water and 5  $\mu$ l 20xSET (3 M NaCl, 0.5 M Tris-HCl pH7.8, 20 mM EDTA). Do one phenol-chloroform extraction, remove most of the organic phase from the bottom, spin briefly and transfer “all” the aqueous phase to a new tube. Add 15  $\mu$ g of

glycoblue and 2.5 volumes ETOH. Mix and spin for 30 minutes at top speed at 4°C. Remove sup and check that most of the radioactivity is in the pellet. If not spin longer. Wash pellet with 70% ETOH, let dry at RT. Resuspend in 6 µl of Urea sample buffer (7 M urea, 1xTBE plus dyes).

**1C.** Mix the cold (9 µl) and the hot RNA (6 µl). heat at 90°C for two minutes, spin briefly and separate the sample on a 20 cm x 20 cm x 0.5 mm 15% acrylamide-7M Urea gel. In a separate well away from the sample load a sufficient amount of radiolabeled DNA molecular weight marker (MspI-digested pBR322) to be visualized within a 30 minutes exposure to film or a phosphorimager screen. The size of each well should be 7 mm x 9 mm x 0.5 mm. Run the gel till the Bromophenol Blue (BPB) has run out and expose it to a phosphorimager screen (30 min should be sufficient). Identify the position of the 20-30 nt RNAs with the help of the radiolabeled DNA marker and the pCp labeled material. Cut out the gel slice containing the material of interest and add 400 µl of 0.4 M NaCl. Freeze in dry ice-ethanol and set the tube in the fridge overnight to elute.

**1D.** Quickly vortex and spin the tube for 2 min at top speed, transfer the eluate to a siliconized microfuge tube and check that most of the radioactivity is in the eluate. Do one phenol:chloroform extraction, remove most of the organic phase from the bottom, spin briefly and transfer “all” the aqueous phase to a new tube. Add 15 µg glycoblue and 2.5 volumes ETOH. Mix and spin for 30 minutes at top speed at 4°C. Remove sup and check that most of the radioactivity is in the pellet. If not spin longer. Wash pellet with 70% ETOH, let dry at RT. Resuspend in 13 µl water.

### **1E. 3' adaptor ligation**

Set up the following reaction:

|                            |       |
|----------------------------|-------|
| Gel purified RNA in water: | 13 µl |
| DMSO                       | 2 µl  |

Heat at 90°C for 1 min, set on ice for 1 min, spin briefly. Then add:

|                                    |       |
|------------------------------------|-------|
| 10 x ATP-free T4 RNA ligase buffer | 2 µl  |
| 3' adaptor (50 µM)                 | 1 µl  |
| Mutant T4 RNA ligase (NEB)         | 2 µl  |
| Total                              | 20 µl |

Incubate at RT for 1 hr and then at 4°C ON.

10 x ATP-free T4 RNA ligase buffer: 500 mM Tris-HCl (pH 7.5-7.6), 100 mM MgCl<sub>2</sub>. 100 mM DTT, 600 µg/ml BSA (NEB)

To the ligated material add 80 µl water, 10 µl 20xSET and 100 µl phenol:chloroform. Vortex, spin and remove aqueous phase to a siliconized microfuge tube. Add 15 µg glycoblue and 300 µl

ETOH, mix and spin for 15 minutes at top speed at 4°C. Remove sup, wash 1x with cold 70% ETOH. Dry pellet. Resuspend in 10-15 µl of Urea sample buffer.

Separate the sample on a 20 cm x 20 cm x 0.5 mm 15% acrylamide-7 M Urea gel. The size of each well should be 7 mm x 9 mm x 0.5 mm. Run the gel till the BPB is out and expose it to a phosphorimager screen (30 min should be sufficient). Identify the position of the RNA-3` adaptor ligation product with the help of a radiolabeled DNA marker (MspI-digested pBR322) and the pCp labeled material. Cut out the gel slice containing the material of interest and add 400 µl of 0.4 M NaCl. Freeze in dry ice-ethanol and set the tube in the fridge ON to elute.

Quickly vortex and spin the tube for 2 min at top speed, transfer the eluate to a siliconized microfuge tube and check that most of the radioactivity is in the eluate, do one phenol:chloroform extraction, remove most of the organic phase from the bottom, spin briefly and transfer "all" the aqueous phase to a new tube. Add 15 µg glycoblu and 2.5 volumes ETOH. Mix and spin for 30 minutes at top speed at 4°C. Remove sup and check that most of the radioactivity is in the pellet. If not spin longer. Wash pellet with 70% ETOH, let dry at RT. Resuspend in 5 µl water.

## **2. Ligation to 5' RNA adaptor (beware this is RNA!!!)**

SIADAR-RC (IDT) 5'- ACACGACGCUCUCCGAUCU -3'

10x buffer (50 µl) (Make fresh)

|                                             |       |
|---------------------------------------------|-------|
| 1 M Tris-HCl pH 8.0                         | 25 µl |
| acetylated BSA 1mg/ml (NEB)                 | 5 µl  |
| 1 M MgCl <sub>2</sub>                       | 5 µl  |
| 100 mM HCC (hexamine cobalt (III) chloride) | 5 µl  |
| 100 mM ATP                                  | 1 µl  |
| 100 mM DTT                                  | 5 µl  |
| Water                                       | 4 µl  |

To the RNA ligated to the 3' adaptor in 5 µl of sterile water, add:

1 µl SIADAR-RC (300 µg/ml)

Heat at 90°C for 1 min, transfer to ice, spin down briefly. Make sure RNA is resuspended. Then add:

|                     |                    |
|---------------------|--------------------|
| 10x ligation buffer | 2 µl               |
| 35% PEG (8000)      | 6 µl               |
| T4 RNA ligase       | 2 µl (from AMBION) |
| Water               | 4 µl               |

Gently mix by pipetting up and down, do not vortex. Incubate ON at 15°C.

### **3. cDNA synthesis**

To the ligated material add 80 µl water, 10 µl 20xSET and 100 µl phenol:chloroform. Vortex, spin and remove aqueous phase to a siliconized microfuge tube. Add 15 µg glycoblue and 300 µl ETOH, mix and spin for 30 minutes at top speed at 4°C. Remove sup, wash 1x with cold 70% ETOH. Air dry pellet.

#### **To the dry pellet add:**

|                                  |                                |
|----------------------------------|--------------------------------|
| 3'RT primer (750 µg/ml in water) | 1 µl (5'-ATTGATGGTGCCTACAG-3') |
| H <sub>2</sub> O                 | 7 µl                           |

Heat for 1 min at 90°C in a PCR machine. Set on ice for 1 min, spin briefly and check that the RNA is in solution by drawing the solution in a pipette tip.

#### **Add:**

|             |      |
|-------------|------|
| 5xRT buffer | 4 µl |
|-------------|------|

Incubate at 65°C for 5 minutes, transfer to ice for 5 minutes, spin down briefly

#### **Add:**

|                                      |      |
|--------------------------------------|------|
| 0.1 M DTT                            | 2 µl |
| 10 mM dNTPs (no dCTP)                | 1 µl |
| α- <sup>32</sup> P-dCTP (10 µCi/ µl) | 5 µl |
| Superscript III RT                   | 1 µl |

Incubate at 50°C for 30 min, then add 1 µl 10 mM dCTP and 1 µl RT. Let reaction proceed for additional 30 min.

### **4. RNA hydrolysis and gel purification of cDNA**

#### **Add:**

|         |      |
|---------|------|
| 1N NaOH | 7 µl |
|---------|------|

Incubate at 55°C for 30 min

Neutralize by adding 10 µl 1M Tris-HCl pH 7.4 plus 7 µl 1N HCl. Add 47 µl 5 M Ammonium Acetate (Ambion), 2 µl glycoblue (Ambion) plus 300 µl ETOH. Mix, spin for 15 min at 4°C, wash with 70% ETOH (2x), dry pellet.

Resuspend pellet in 10 µl H<sub>2</sub>O, heat at 65°C for 5 minutes, check that the cDNA is in solution.

Add 10 µl formamide loading buffer (Ambion) and heat at 90-100°C for 5 minutes with the cap open. Load on a 20 cm x 20 cm x 0.5 mm 15% sequencing gel and run till BPB is at the bottom. As a marker use radiolabeled pBR322/MspI. Cover the gel with Saran Wrap and expose to a phosphorimager screen for the necessary time (15-30 minutes is usually sufficient). The cDNA should migrate as a series of bands approximately 59-69 nt long. We also observe lower as well as higher MW material, but it should be of much lower intensity than the major cDNA product.

Cut out the gel section corresponding to the cDNA, transfer to a siliconized microfuge tube and add 400 µl of 0.4 M NaCl. Freeze in dry ice-ethanol and set the tube in the fridge ON to elute.

Proceed as described in section 1D.

## **5. PCR amplification of ligated cDNA**

Make three dilutions of ligated cDNA - 1:25, 1:50, 1:100. Use water for the dilutions and always use siliconized tubes.

Primers Sequences:

### SOL5' PRIM-Fwd

5` AATGATACGGCGACCACCGACACTCTTTCCCTACACGACGCTCTTCCGATCT

### SOL3' PRIM-Rev

5` CAAGCAGAAGACGGCATAACGAGCTCTTCCGATCATTGATGGTGCCTACAG 3`

## **PCR Reaction**

|                         |       |
|-------------------------|-------|
| 10x Pfx buffer          | 5 µl  |
| 50 mM MgSO <sub>4</sub> | 2 µl  |
| 10 mM dNTPs             | 1 µl  |
| SOL5' PRIM (100µg/ml)   | 1 µl  |
| SOL3' PRIM (100µg/ml)   | 1 µl  |
| H <sub>2</sub> O        | 38 µl |
| Platinum Pfx polymerase | 1 µl  |

Do one reaction with 1µl H<sub>2</sub>O to serve as negative control. Set up 4 reactions: one with 1µl of undiluted cDNA and 3 reactions with 1µl each of the three cDNA dilutions.

**For PCR we use the MJ machine with the following cycling parameters:**

Step 1            94°C            2 min

Step 2            94°C            15 sec

                    54°C            30 sec

                    68°C            30 sec

Repeat step 2, x4 cycles

Step 3            94°C            15 sec

                    65°C            30 sec

                    68°C            30 sec

Repeat step 5, x22 cycles

72°C            5 min

Run 10 µl of the PCR products on a 1.5 % agarose gel in TBE buffer next to 0.5 µg of the 100 bp DNA ladder (Invitrogen). The PCR products run at about 120-150nt.

**It is essential that the PCR reaction does not reach saturation.** For this reason, after choosing the dilution, the number of cycles should be adjusted. You have to use the number of cycles where the reaction is not saturated.

Repeat step 5 above, x15, x18, x21, x24 taking 5 µl aliquots every 3 cycles.

Run PCR products on a 1.5% agarose gel in 1x TBE buffer next to 0.5 µg of the 100 bp DNA ladder (Invitrogen).

Once you have determined the required amplification parameters, set up a preparative 100 µl PCR reaction. Run the products on a 1.5% agarose gel in 1xTBE. Cut the gel slice containing the amplified material and purify the DNA from the agarose gel using standard procedures. Determine DNA concentration by running 1/10 of the recovered material on a 1.5% agarose gel in 1x TBE using a DNA marker ladder in which the mass of each band is known (50 bp DNA ladder from NEB).

To determine the quality of your library it is advisable to TA clone a small aliquot and send for sequencing 20 plasmid clones.
